# Supplementary material for: Semiochemical 2-Methyl-2-butenal Reduced Signs of Stress in Cats during Transport
Source: MDPI journal article supplement (doi:10.3390/ani14020341), 2024-01-22
Supplement: s1 [file s1]

**Supplementary 1 (S1)**

Table S1. List of cats and their sex, weight and age used in this study

| Cat ID  | Sex           | Body weight, kg | Age (year) | Trip | TRT     |
|---------|---------------|-----------------|------------|------|---------|
| 241F    | F             | 2.6             | 2          | 1    | Control |
| 245M    | M             | 3.7             | 1.5        | 2    | Control |
| 217M    | M (castrated) | 4.4             | 9          | 3    | Control |
| 215F    | F             | 2.8             | 9          | 4    | Control |
| 23M     | M             | 4.7             | 16         | 1    | Control |
| 52F     | F             | 3.8             | 10         | 2    | Control |
| 251M    | M             | 4.4             | 1.5        | 3    | Control |
| 13CPU5F | F             | 2.9             | 2          | 4    | Control |
| 249F    | F (spayed)    | 3.3             | 9          | 1    | 2M2B    |
| 242M    | M             | 4.6             | 2          | 2    | 2M2B    |
| 234F    | F             | 4.7             | 6          | 3    | 2M2B    |
| 221M    | M             | 3.4             | 6          | 4    | 2M2B    |
| 239M    | M             | 4.7             | 2          | 1    | 2M2B    |
| 250F    | F             | 3.8             | 1.5        | 2    | 2M2B    |
| 248M    | M             | 4.3             | 1.5        | 3    | 2M2B    |
| 246F    | F             | 4.5             | 1.5        | 4    | 2M2B    |
